# Supplementary material
Source: Royal Society of Chemistry journal article supplement (doi:10.1039/d6nj00933f)
Supplement: d6nj00933f1.pdf [file d6nj00933f1.pdf]

# Supporting Information

## Atomic Precision Engineering of Heterometallic Hexanuclear Al/M

### MOFs for Supercapacitor Applications

Bo Yan<sup>a</sup>, Wenjuan Ji<sup>a,\*</sup>, Shucong Fan<sup>b</sup>, Weiwei Pei<sup>a</sup>, Guifang Liu<sup>a</sup>, Bingqiang Wang<sup>a</sup>, Quanguo Zhai<sup>b,\*</sup>, Yunlong Fu<sup>a,\*</sup>

<sup>a</sup>Key Laboratory of Magnetic Molecules and Magnetic Information Materials Ministry of Education & School of Chemistry and Chemical Engineering of Shanxi Normal University, Taiyuan, Shanxi, 030032, PR China

<sup>b</sup>Key Laboratory of Applied Surface and Colloid Chemistry (MOE), School of Chemistry & Chemical Engineering, Shaanxi Normal University, Xi'an, Shaanxi, 710062, China.

*\*Corresponding author.*

**E-mail address:** [jiwj@sxnu.edu.cn](mailto:jiwj@sxnu.edu.cn); [zhaiqq@snnu.edu.cn](mailto:zhaiqq@snnu.edu.cn); [yunlongfu@sxnu.edu.cn](mailto:yunlongfu@sxnu.edu.cn).

## Contents

|                                                                                                                                                                                                                                                                                                                                                                        |        |
|------------------------------------------------------------------------------------------------------------------------------------------------------------------------------------------------------------------------------------------------------------------------------------------------------------------------------------------------------------------------|--------|
| 1. General materials and methods and FT-IR spectra.....                                                                                                                                                                                                                                                                                                                | S4     |
| 2. Tables.....                                                                                                                                                                                                                                                                                                                                                         | S5-S6  |
| Table S1. Crystal data and structure refinement for SXNU-20-Al/Ni.....                                                                                                                                                                                                                                                                                                 | S5     |
| Table S2. Selected bonded lengths (Å) and angles (°) for SXNU-20-Al/Ni.....                                                                                                                                                                                                                                                                                            | S6     |
| Table S3. ICP of SXNU-20-Al/M (M = Mn, Co, Ni).....                                                                                                                                                                                                                                                                                                                    | S6     |
| 3. Figures.....                                                                                                                                                                                                                                                                                                                                                        | S7-S11 |
| <b>Fig. S1. Coordination</b> environment diagram: (a) for SXNU-20-Al/Mn, and (b) for SXNU-20-Al/Ni.....                                                                                                                                                                                                                                                                | S7     |
| <b>Fig. S2.</b> Two interpenetrated networks connected by INA ligand form the non-interpenetrated framework SXNU-20-Al/Mn. (a, b) hexanuclear cluster and its simplified 12-connected node, (c, d) BTB <sup>3-</sup> and INA ligands and their simplification, (e, f) the structure of the cage and (g, h) its topology network, (i) two interpenetrated networks..... | S7     |
| <b>Fig. S3.</b> (a) FT-IR spectra of compounds SXNU-20-Al/M (M = Mn, Co, and Ni); (b) thermogravimetric curves of compounds SXNU-20-Al/M (M = Mn, Co, and Ni).....                                                                                                                                                                                                     | S8     |
| <b>Fig. S4.</b> EDS of SXNU-20-Al/M (M = Mn, Co, Ni).....                                                                                                                                                                                                                                                                                                              | S9     |
| <b>Fig. S5.</b> CV curves for SXNU-20-Al/M (M = Mn, Co, Ni) MOF electrodes materials, (a-c) at varying scan rates of 5 to 50 mV s <sup>-1</sup> ; (d-f) Galvanostatic charge-discharge curves for SXNU-20 at various current densities from 1 to 5 A g <sup>-1</sup> .....                                                                                             | S9     |
| <b>Fig. S6.</b> The PXRD patterns after 1000 cycles.....                                                                                                                                                                                                                                                                                                               | S9     |
| <b>Fig. S7.</b> (a-f) After the cycling scanning electron microscopy (SEM) of the SXNU-20-Al/M coating on the foam Ni plate..                                                                                                                                                                                                                                          | S10    |
| <b>Fig. S8.</b> An illustration of the asymmetric supercapacitor with the SXNU-20-Al/M (M = Mn, Co) positive electrode and AC negative electrode: (a) for SXNU-20-Al/Mn, (c) for SXNU-20-Al/Co;                                                                                                                                                                        |        |

Cyclic voltammetry (CV) curves of (b) SXNU-20-Al/Mn and (d) SXNU-20-Al/Ni electrodes at a scan rate of  $10 \text{ mV s}^{-1}$ ; Two-electrode capacitor performance: Galvanostatic charge-discharge curves of (e) SXNU-20-Al/Mn and (f) SXNU-20-Al/Co at different current densities. .... S10

## **1. General materials and methods**

All experimental materials and reagents were procured from commercial suppliers without further purification. Infrared spectra were recorded using PerkinElmer Fourier transform infrared (FTIR) spectroscopy instruments, with dried KBr powder serving as a matrix. The FT-IR spectrum was measured in the range of 4000-400  $\text{cm}^{-1}$ . Powder X-ray diffraction (PXRD) data was collected on a Ultima Model IV-185 powder diffractometer with Cu-K $\alpha$  radiation (40 kV, 40 mA). Thermal gravimetric analysis (TGA) was carried out on a Q600 thermal analyzer and heated from room temperature to 800  $^{\circ}\text{C}$  at a heating rate of 10  $^{\circ}\text{C min}^{-1}$  under a nitrogen atmosphere. The morphology of the synthesized material was characterized by field emission scanning electron microscope (SEM; JSM-7500F, Japan) and TEM (JEDL-JEM F200). ICP-MS analysis was conducted using the NexION<sup>TM</sup> 300X.

**Table S1.** Crystal data and structure refinement for SXNU-20-Al/Mn, SXNU-20-Al/Ni

| Compounds                                            | SXNU-20-Al/Ni                                                                                     |
|------------------------------------------------------|---------------------------------------------------------------------------------------------------|
| Empirical formula                                    | C <sub>102</sub> H <sub>108</sub> Al <sub>4</sub> Ni <sub>2</sub> N <sub>11</sub> O <sub>41</sub> |
| Formula weight                                       | 2369.33                                                                                           |
| Crystal system                                       | cubic                                                                                             |
| Space group                                          | <i>I</i> 23                                                                                       |
| <i>a</i> (Å)                                         | 27.3691(7)                                                                                        |
| <i>b</i> (Å)                                         | 27.3691(7)                                                                                        |
| <i>c</i> (Å)                                         | 27.3691(7)                                                                                        |
| $\alpha$ (°)                                         | 90.00                                                                                             |
| $\beta$ (°)                                          | 90.00                                                                                             |
| $\gamma$ (°)                                         | 90.00                                                                                             |
| Volume/Å <sup>3</sup>                                | 20501.3(16)                                                                                       |
| <i>Z</i>                                             | 6                                                                                                 |
| $\rho_{\text{calc}}$ g / cm <sup>3</sup>             | 1.151                                                                                             |
| $\mu$ / mm <sup>-1</sup>                             | 0.376                                                                                             |
| <i>F</i> (000)                                       | 7398.0                                                                                            |
| Crystal size/mm <sup>3</sup>                         | 0.30 × 0.27 × 0.22                                                                                |
| $2\theta$                                            | 4.706 - 52.736°                                                                                   |
| Reflections collected                                | 104432                                                                                            |
| Independent reflections                              | 7006                                                                                              |
| Data/restraints/parameters                           | 7006/400/293                                                                                      |
| Goodness-of-fit on <i>F</i> <sup>2</sup>             | 1.039                                                                                             |
| Final <i>R</i> indexes [ <i>I</i> ≥ 2σ ( <i>I</i> )] | <i>R</i> <sub>1</sub> = 0.0920, <i>wR</i> <sub>2</sub> = 0.2448                                   |
| <i>R</i> indexes [all data]                          | <i>R</i> <sub>1</sub> = 0.1628, <i>wR</i> <sub>2</sub> = 0.3020                                   |
| Largest diff. peak/hole/e Å <sup>-3</sup>            | 1.29/-0.53                                                                                        |

**Table S2.** Selected bonded lengths (Å) and angles (°) for SXNU-20-Al/Ni

|                          |            |                         |            |
|--------------------------|------------|-------------------------|------------|
| Ni1-N1                   | 2.094(7)   | Al1-O2                  | 1.947(11)  |
| Ni1-O1                   | 2.032(9)   | Al1-O4                  | 2.229(9)   |
| Ni1-O1 <sup>a</sup>      | 2.032(9)   | Al1-O6                  | 1.836(5)   |
| Ni1-O3                   | 2.063(8)   | Al1-O7                  | 2.123(10)  |
| Ni1-O3 <sup>a</sup>      | 2.063(8)   | Ni1-O6                  | 2.047(7)   |
| N1-Ni1-O1 <sup>a</sup>   | 90.5(9)    | O1-Ni1-N1               | 87.1(9)    |
| N1-Ni1-O1                | 87.1(9)    | O1-Ni1-O3               | 89.2(2)    |
| O2-Al1-O4                | 101.2(5)   | O2-Al1-Al1 <sup>a</sup> | 118.1(4)   |
| O6-Al1-O2                | 91.3(4)    | O6-Al1-O4               | 79.6(3)    |
| Al1 <sup>a</sup> -O6-Ni1 | 126.86(18) | Al1-O6-Ni1              | 126.86(18) |
| Al1 <sup>a</sup> -O6-Al1 | 106.3(4)   | Al1-O7-Al1 <sup>b</sup> | 98.2(6)    |

Symmetry codes: (a) 1-X, -Y, +Z; (b) +X, -Y, -Z; (c) 1-Y, +Z, 1-X; (d) 1-Z, -X, -Y, (e) 1+Y, -Z, 1-X, (f) 1-Z, 1+X, -Y, (g) 1-Z, 1-X, Y, (h) 1/2-Y, -1/2+Z, 1/2-X.

**Table S3.** ICP-MS of SXNU-20-Al/M (M = Mn, Co, Ni)

| materials     | percentage of mass (wt%) |     |
|---------------|--------------------------|-----|
|               | Al                       | M   |
| SXNU-20-Al/Mn | 8.1                      | 7.6 |
| SXNU-20-Al/Co | 9.9                      | 8.7 |
| SXNU-20-Al/Ni | 8.2                      | 8.4 |

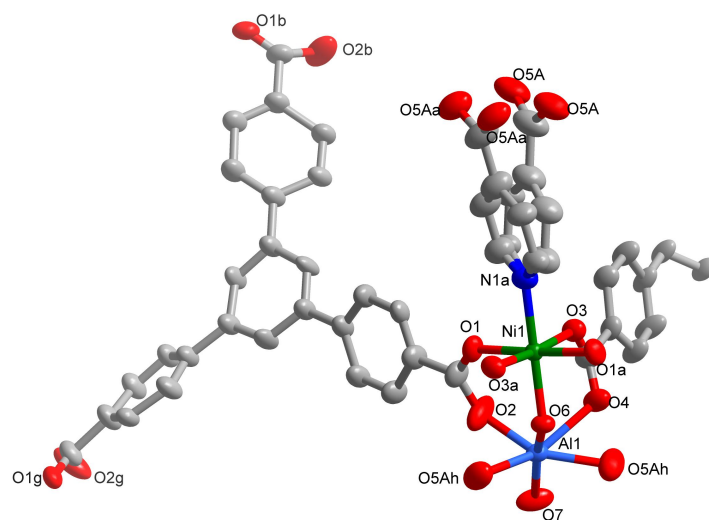

**Fig. S1.** Coordination environment diagram for SXNU-20-Al/Ni

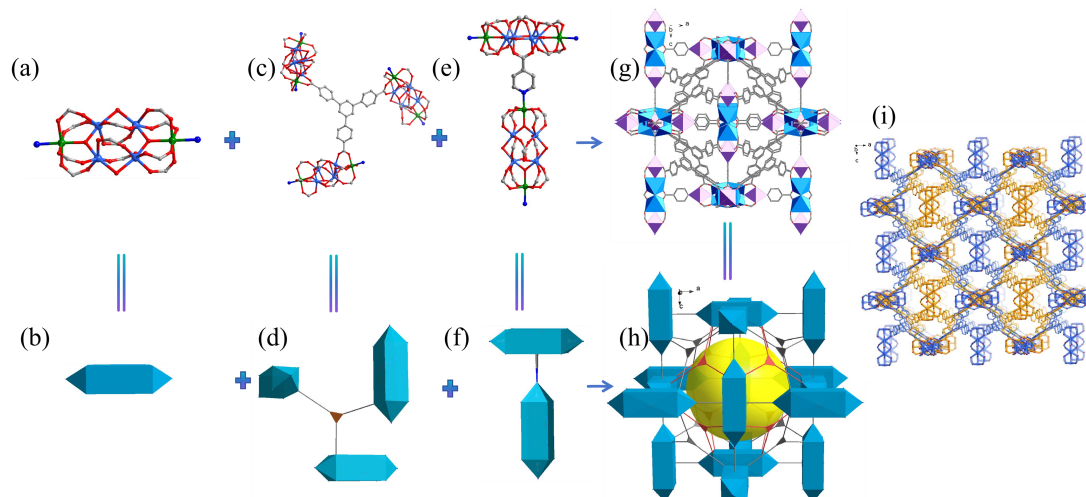

**Fig. S2.** Two interpenetrated networks connected by INA ligand form the non-interpenetrated framework SXNU-20-Al/Ni. (a, b) hexanuclear cluster and its simplified 12-connected node, (c, d)  $\text{BTB}^{3-}$  and INA ligands and their simplification, (e, f) the structure of the cage and (g, h) its topology network, (i) two interpenetrated networks.

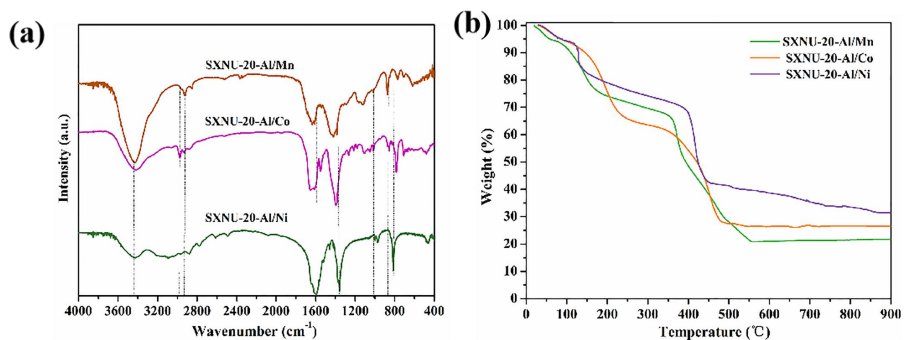

**Fig. S3.** (a) FT-IR spectra of compounds SXNU-20-Al/M (M = Mn, Co, and Ni); (b) thermogravimetric curves of compounds SXNU-20-Al/M (M = Mn, Co, and Ni).

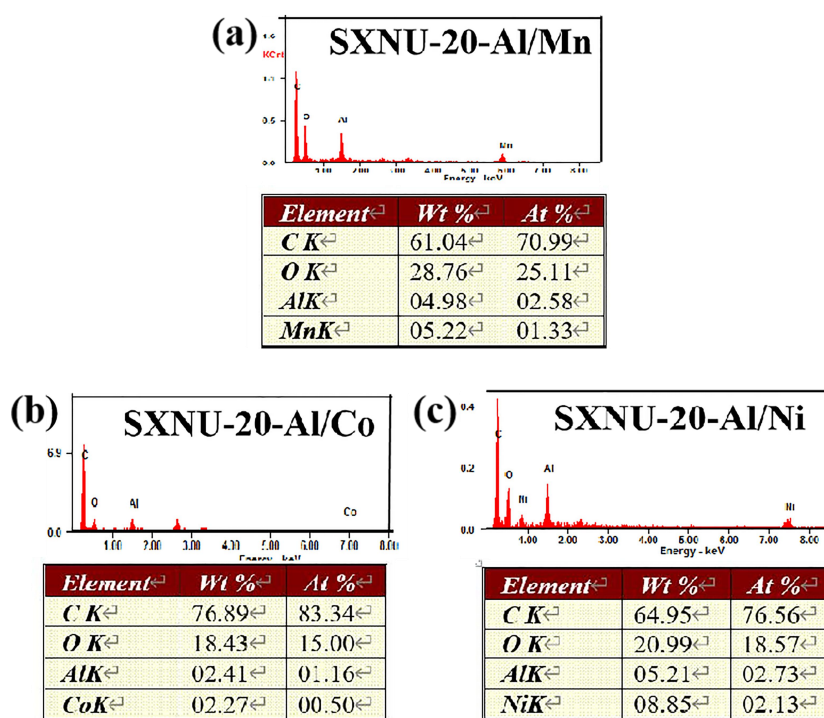

**Fig. S4.** EDS of SXNU-20-Al/M (M = Mn, Co, Ni)

$$C_{sp} = \frac{I\Delta t}{m\Delta V} \quad (S1)$$

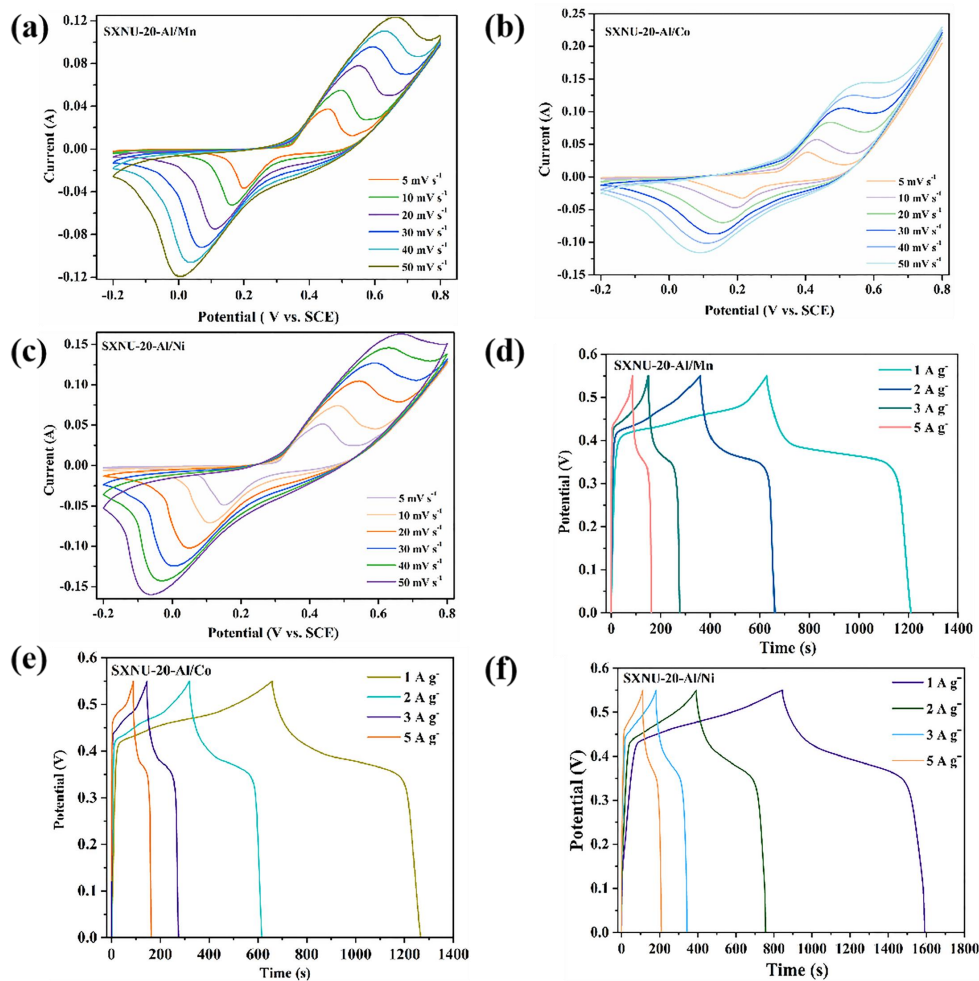

**Fig. S5.** CV curves for SXNU-20-Al/M (M = Mn, Co, Ni) MOF electrodes materials, (a-c) at varying scan rates of 5 to 50 mV s<sup>-1</sup>; (d-f) Galvanostatic charge-discharge curves for SXNU-20 at various current densities from 1 to 5 A g<sup>-1</sup>.

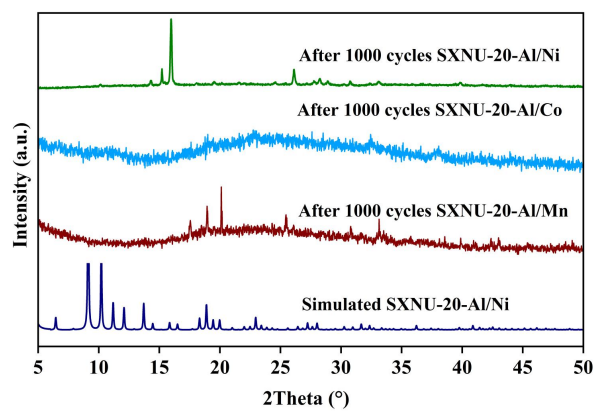

**Fig. S6.** The PXRD patterns after 1000 cycles.

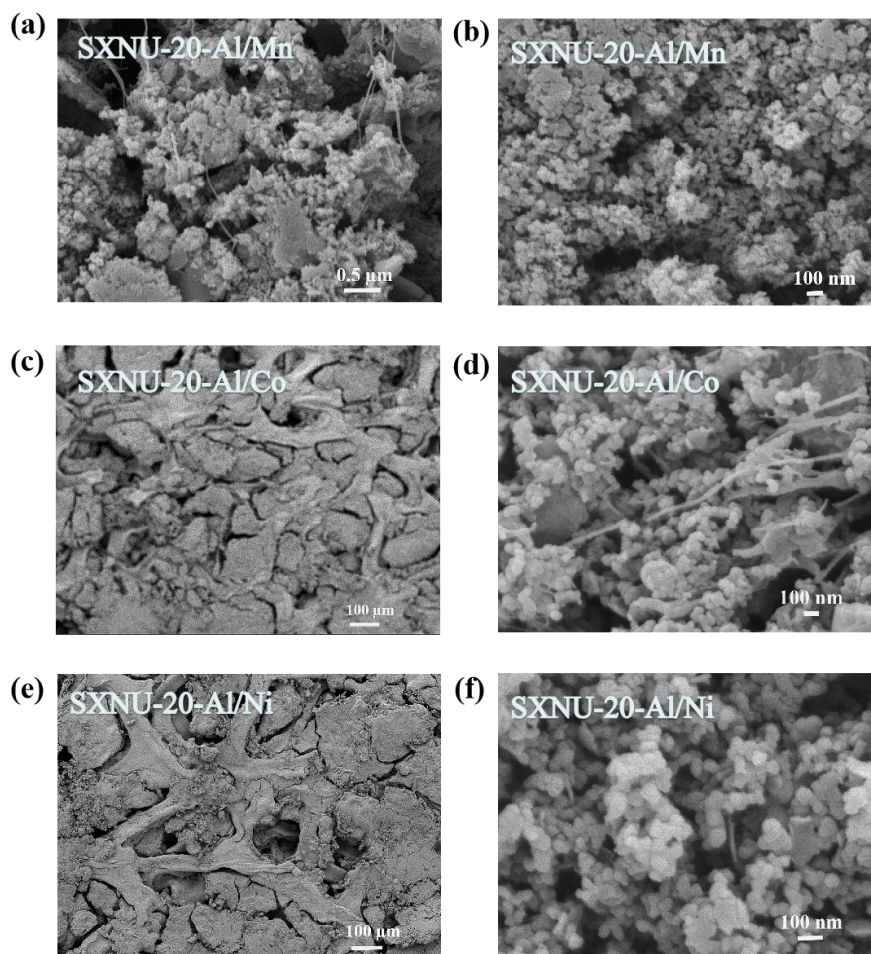

**Fig. S7.** (a-f) After the cycling scanning electron microscopy (SEM) of the SXNU-20-Al/M coating on the foam Ni plate.

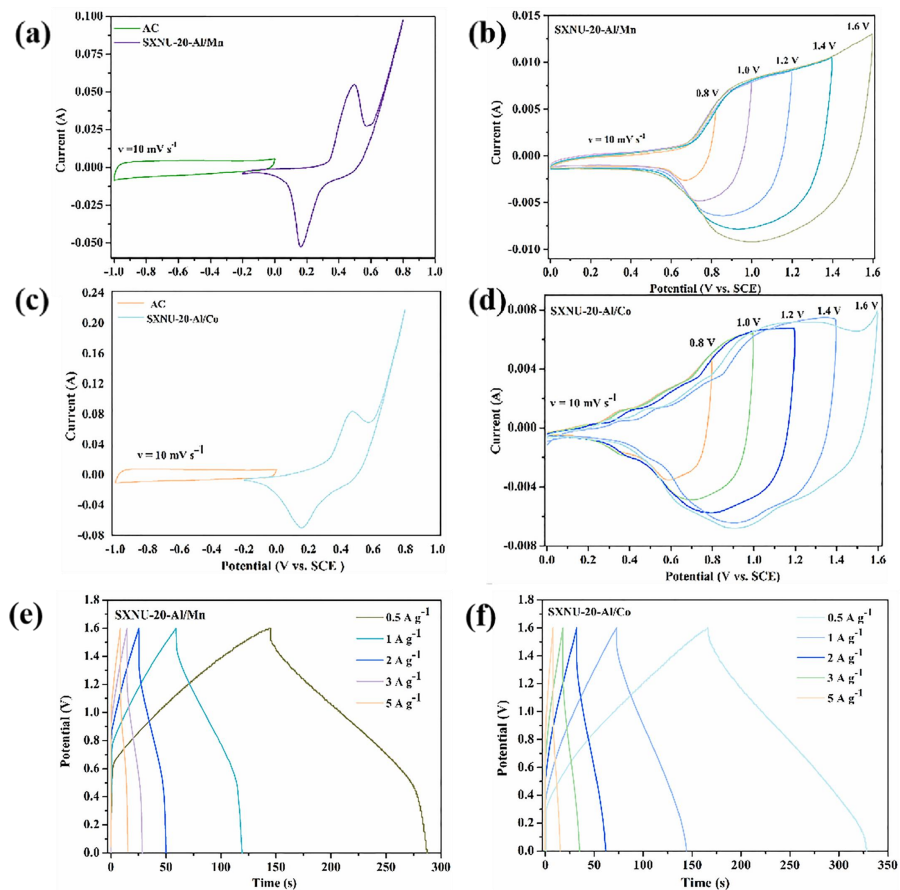

**Fig. S8.** An illustration of the asymmetric supercapacitor with the SXNU-20-Al/M (M = Mn, Co) positive electrode and AC negative electrode: (a) for SXNU-20-Al/Mn, (c) for SXNU-20-Al/Co; Cyclic voltammety (CV) curves of (b) SXNU-20-Al/Mn and (d) SXNU-20-Al/Co electrodes at a scan rate of  $10 \text{ mV s}^{-1}$ ; Two-electrode capacitor performance: Galvanostatic charge-discharge curves of (e) SXNU-20-Al/Mn and (f) SXNU-20-Al/Co at different current densities.
